# Supplementary material for: Continent-wide panmixia of an African fruit bat facilitates transmission of potentially zoonotic viruses
Source: Springer Nature journal article supplement (doi:10.1038/ncomms3770), 2013-11-19
Supplement: 41467_2013_BFncomms3770_MOESM711_ESM.pdf [file 41467_2013_BFncomms3770_MOESM711_ESM.pdf]

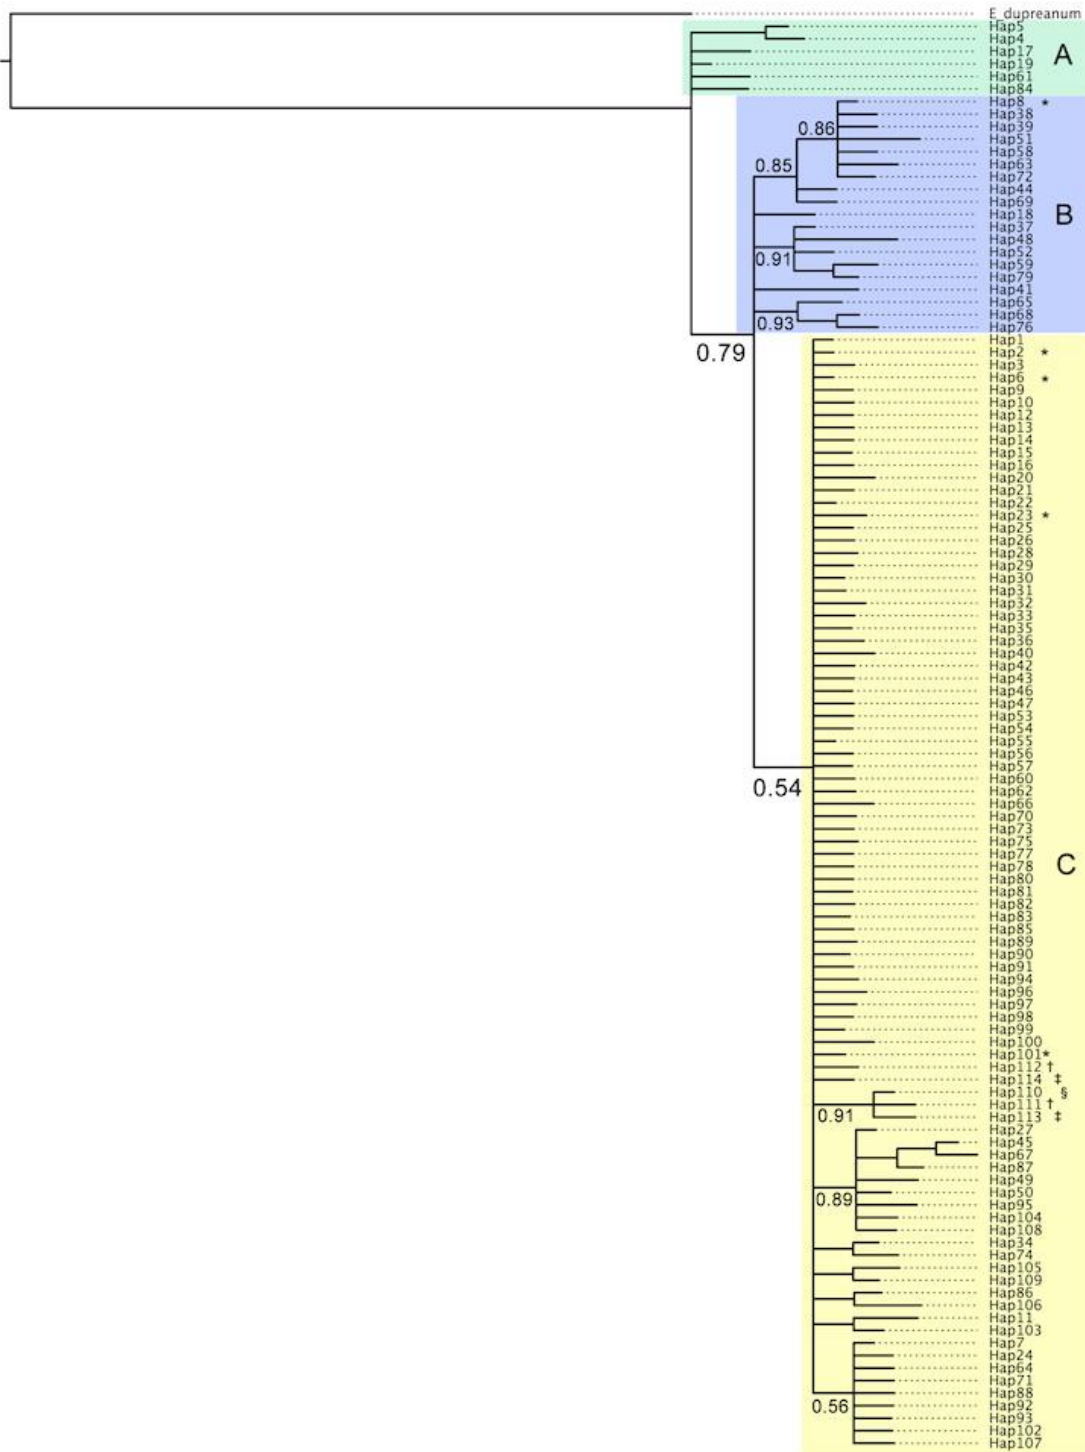

**Supplementary Fig. S1:** *E. helvum* cytochrome *b* haplotype Bayesian phylogeny with *E. dupreanum* used as an outgroup. Three main ‘clades’ are identified: A, B and C. Posterior probabilities are shown on the main branch nodes. \* refers to a haplotype which was represented in continental Africa and Bioko (CB) and on isolated island (iIS), † refers to haplotypes represented only on Príncipe, ‡ refers to haplotypes represented only on São Tomé and § refers to haplotypes present in multiple iIS, but not in CB populations.

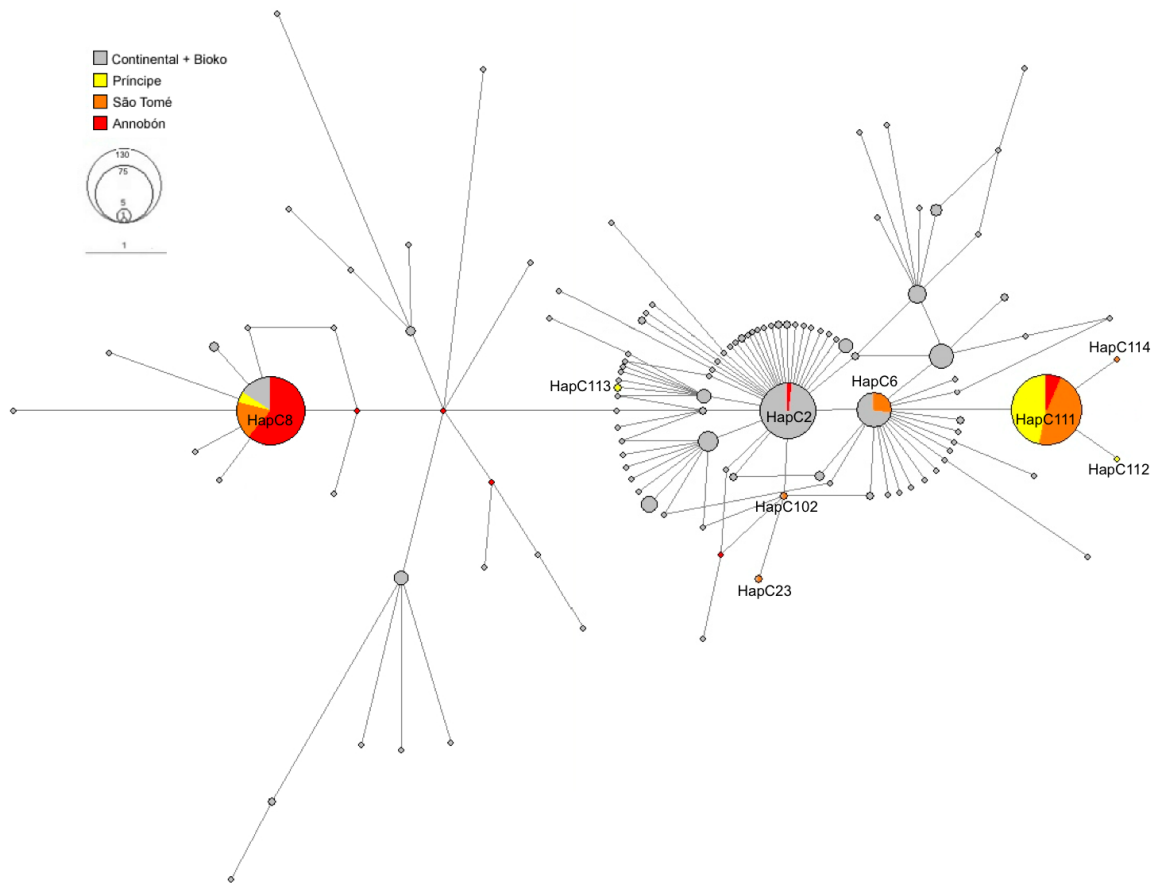

**Supplementary Fig. S2:** *Eidolon helvum* cytochrome *b* median joining haplotype network. Each circle represents a unique haplotype, and its size is proportional to its frequency. Lines represent base pair changes between two haplotypes, with the length proportional to the number of base pair changes. Main haplotypes and those containing island samples are labeled by name. This is the same figure as Fig 2 in the manuscript, but with continental and Bioko samples colored as a single panmictic population, and demonstrating that isolated Gulf of Guinea islands (Príncipe, São Tomé and Annobón) are clustered into two main (and other secondary) haplotypes.

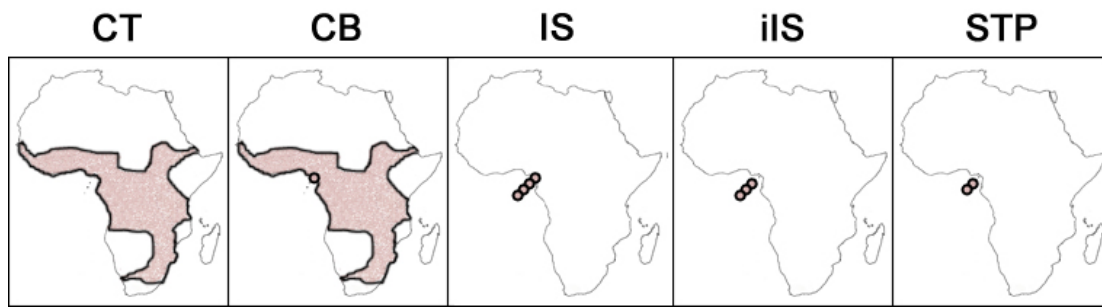

**Supplementary Fig. S3:** Demonstration of regional population groupings used in genetic analyses, including all continental populations (CT), all continental populations plus Bioko (CB), all four island populations (IS), three isolated island populations (São Tomé, Príncipe and Annobón) (iIS), and São Tomé and Príncipe (STP)

**Supplementary Table S1.** Estimates of population pairwise  $\Phi_{ST}$  values from mtDNA (below the diagonal) and  $F_{ST}$  values from microsatellites (above the diagonal) among twelve *E. helvum* populations. Bold values represent significance at  $p < 0.05$ , bold and italicised values represent significance at  $p < 0.01$ .

|       |    | Microsatellites |             |             |             |             |             |             |             |             |             |             |             |
|-------|----|-----------------|-------------|-------------|-------------|-------------|-------------|-------------|-------------|-------------|-------------|-------------|-------------|
|       |    | GH              | DR          | KE          | ZA          | MA          | TZ          | UG          | RM          | BI          | PR          | ST          | AN          |
| mtDNA | GH |                 | 0.00        | -0.00       | -0.01       | -0.01       | -0.00       | -0.03       | -0.01       | -0.00       | <b>0.05</b> | <b>0.04</b> | <b>0.12</b> |
|       | DR | -0.01           |             | 0.00        | -0.00       | -0.01       | -0.00       | -0.03       | 0.01        | -0.00       | <b>0.05</b> | <b>0.03</b> | <b>0.11</b> |
|       | KE | -0.00           | -0.02       |             | 0.00        | -0.01       | -0.01       | -0.03       | 0.00        | -0.00       | <b>0.05</b> | <b>0.03</b> | <b>0.12</b> |
|       | ZA | 0.02            | -0.00       | -0.02       |             | -0.01       | -0.01       | -0.04       | -0.00       | -0.00       | <b>0.05</b> | <b>0.03</b> | <b>0.12</b> |
|       | MA | 0.04            | 0.02        | -0.01       | -0.02       |             | -0.01       | -0.04       | 0.00        | -0.01       | <b>0.03</b> | <b>0.02</b> | <b>0.10</b> |
|       | TZ | 0.05            | 0.02        | -0.00       | -0.00       | -0.03       |             | -0.03       | 0.00        | -0.00       | <b>0.03</b> | <b>0.02</b> | <b>0.12</b> |
|       | UG | -0.02           | -0.01       | -0.05       | -0.05       | -0.03       | -0.03       |             | -0.02       | -0.03       | <b>0.02</b> | <b>0.02</b> | <b>0.11</b> |
|       | RM | 0.03            | -0.01       | -0.03       | -0.03       | -0.04       | -0.04       | -0.05       |             | 0.01        | <b>0.05</b> | <b>0.04</b> | <b>0.15</b> |
|       | BI | -0.00           | -0.01       | -0.01       | 0.00        | 0.02        | 0.03        | -0.04       | 0.00        |             | <b>0.04</b> | <b>0.03</b> | <b>0.11</b> |
|       | PR | <b>0.50</b>     | <b>0.54</b> | <b>0.51</b> | <b>0.53</b> | <b>0.57</b> | <b>0.49</b> | <b>0.61</b> | <b>0.59</b> | <b>0.46</b> |             | <b>0.01</b> | <b>0.07</b> |
|       | ST | <b>0.31</b>     | <b>0.27</b> | <b>0.27</b> | <b>0.30</b> | <b>0.32</b> | <b>0.28</b> | <b>0.33</b> | <b>0.28</b> | <b>0.29</b> | <b>0.07</b> |             | <b>0.07</b> |
|       | AN | <b>0.57</b>     | <b>0.59</b> | <b>0.54</b> | <b>0.53</b> | <b>0.49</b> | <b>0.39</b> | <b>0.60</b> | <b>0.46</b> | <b>0.50</b> | <b>0.77</b> | <b>0.58</b> |             |

**Supplementary Table S2.** Assignment probabilities of admixed individuals from STRUCTURE analyses. The majority of individuals in the analyses (n=483/502) had assignment probabilities of >80% to the cluster they were sampled from, and are not shown in this table. No recent (first generation) immigrants (>80% assignment probability to a cluster other than the cluster they were sampled from) were identified. The table therefore contains data from individuals classified as 'admixed' (20-80% assignment probability to a cluster other than the cluster they were sampled from). The proportional assignment of individual, and its previous two generations of ancestors to each of three Bayesian population clusters, is shown (I = Individual, P = Parent, G = Grandparent). Four bats (#411, 430, 734, 792) had assignment probabilities of <50% to the cluster from which they were sampled (highlighted in bold), indicating the possibility of immigration within the previous two generations.

| Sample ID  | Sampling location |         | Assignment % to cluster CB |     |     | Assignment % to cluster STP |     |     | Assignment % to cluster AN |     |     |
|------------|-------------------|---------|----------------------------|-----|-----|-----------------------------|-----|-----|----------------------------|-----|-----|
|            | Population        | Cluster | I                          | P   | G   | I                           | P   | G   | I                          | P   | G   |
| 252        | ZA                | CB      | 77%                        |     |     | 7%                          | 7%  | 7%  | 0%                         | 0%  | 0%  |
| 472        | TZ                | CB      | 78%                        |     |     | 0%                          | 1%  | 4%  | 0%                         | 0%  | 0%  |
| 980        | TZ                | CB      | 75%                        |     |     | 0%                          | 2%  | 5%  | 0%                         | 1%  | 1%  |
| 608        | UG                | CB      | 76%                        |     |     | 2%                          | 11% | 8%  | 0%                         | 0%  | 0%  |
| <b>411</b> | RM                | CB      | <b>32%</b>                 |     |     | 0%                          | 30% | 12% | 0%                         | 13% | 13% |
| 398        | BI                | CB      | 69%                        |     |     | 3%                          | 6%  | 9%  | 0%                         | 1%  | 1%  |
| 864        | BI                | CB      | 57%                        |     |     | 0%                          | 9%  | 9%  | 0%                         | 0%  | 0%  |
| 931        | BI                | CB      | 64%                        |     |     | 1%                          | 17% | 12% | 0%                         | 0%  | 0%  |
| <b>430</b> | PR                | STP     | 29%                        | 9%  | 12% | <b>49%</b>                  |     |     | 0%                         | 0%  | 0%  |
| 431        | PR                | STP     | 14%                        | 5%  | 6%  | 74%                         |     |     | 0%                         | 0%  | 0%  |
| <b>734</b> | PR                | STP     | 22%                        | 17% | 19% | <b>42%</b>                  |     |     | 0%                         | 0%  | 0%  |
| 769        | ST                | STP     | 0%                         | 0%  | 0%  | 68%                         |     |     | 0%                         | 13% | 13% |
| 973        | ST                | STP     | 0%                         | 0%  | 1%  | 74%                         |     |     | 3%                         | 13% | 13% |
| 612        | ST                | STP     | 0%                         | 6%  | 12% | 80%                         |     |     | 0%                         | 0%  | 0%  |
| 673        | ST                | STP     | 1%                         | 14% | 15% | 69%                         |     |     | 0%                         | 0%  | 0%  |
| 690        | ST                | STP     | 0%                         | 0%  | 1%  | 75%                         |     |     | 0%                         | 1%  | 1%  |
| <b>792</b> | AN                | AN      | 0%                         | 0%  | 13% | 1%                          | 18% | 18% | <b>36%</b>                 |     |     |
| 795        | AN                | AN      | 0%                         | 1%  | 22% | 0%                          | 0%  | 0%  | 76%                        |     |     |
| 819        | AN                | AN      | 0%                         | 0%  | 4%  | 0%                          | 4%  | 4%  | 74%                        |     |     |

**Supplementary Table S3:** GenBank Acquisition numbers for sequences used in phylogenetic analyses of known henipaviruses and henipavirus-like viruses globally and other known Paramyxovirinae.

| GenBank Accession | Description                                           |
|-------------------|-------------------------------------------------------|
| NC_005339         | Mossman virus                                         |
| FJ362497          | Nariva virus                                          |
| NC_007454         | J virus                                               |
| NC_007803         | Beilong virus                                         |
| HQ660129          | Bat Paramyxovirus <sup>13</sup>                       |
| FJ609191          | Bat Paramyxovirus <sup>13</sup>                       |
| HQ660151          | Bat Paramyxovirus <sup>13</sup>                       |
| HQ660123          | Bat Paramyxovirus <sup>13</sup>                       |
| HQ660149          | Bat Paramyxovirus <sup>13</sup>                       |
| HQ660146          | Bat Paramyxovirus <sup>13</sup>                       |
| HQ660143          | Bat Paramyxovirus <sup>13</sup>                       |
| HQ660125          | Bat Paramyxovirus <sup>13</sup>                       |
| HQ660124          | Bat Paramyxovirus <sup>13</sup>                       |
| HQ660126          | Bat Paramyxovirus <sup>13</sup>                       |
| HQ660148          | Bat Paramyxovirus <sup>13</sup>                       |
| AY988601          | Nipah virus Bangladesh                                |
| AF212302          | Nipah virus Malaysia                                  |
| NC_001906         | Hendra virus                                          |
| HM044317          | Hendra virus strain HeV/Australia/Horse/2008/Redlands |
| HQ660144          | Bat Paramyxovirus <sup>13</sup>                       |
| HQ660141          | Bat Paramyxovirus <sup>13</sup>                       |
| JQ001776          | Cedar virus                                           |
| HQ660139          | Bat Paramyxovirus <sup>13</sup>                       |
| HQ660145          | Bat Paramyxovirus <sup>13</sup>                       |
| HQ660132          | Bat Paramyxovirus <sup>13</sup>                       |
| HQ660131          | Bat Paramyxovirus <sup>13</sup>                       |
| HQ660133          | Bat Paramyxovirus <sup>13</sup>                       |
| FJ971936          | Bat Paramyxovirus <sup>13</sup>                       |
| HQ660142          | Bat Paramyxovirus <sup>13</sup>                       |
| HQ660127          | Bat Paramyxovirus <sup>13</sup>                       |
| HQ660135          | Bat Paramyxovirus <sup>13</sup>                       |
| HQ660134          | Bat Paramyxovirus <sup>13</sup>                       |
| FJ971938          | Bat Paramyxovirus <sup>13</sup>                       |
| FJ609194          | Bat Paramyxovirus <sup>13</sup>                       |
| HQ660150          | Bat Paramyxovirus <sup>13</sup>                       |
| FJ971937          | Bat Paramyxovirus <sup>13</sup>                       |
| HQ660140          | Bat Paramyxovirus <sup>13</sup>                       |
| FJ971940          | Bat Paramyxovirus <sup>13</sup>                       |
| HQ660147          | Bat Paramyxovirus <sup>13</sup>                       |
| HQ660120          | Bat Paramyxovirus <sup>13</sup>                       |
| HQ660121          | Bat Paramyxovirus <sup>13</sup>                       |
| HQ660122          | Bat Paramyxovirus <sup>13</sup>                       |
| HQ660128          | Bat Paramyxovirus <sup>13</sup>                       |
| HQ660118          | Bat Paramyxovirus <sup>13</sup>                       |
| HQ660137          | Bat Paramyxovirus <sup>13</sup>                       |
| HQ660119          | Bat Paramyxovirus <sup>13</sup>                       |
| HQ660152          | Bat Paramyxovirus <sup>13</sup>                       |
| HQ660138          | Bat Paramyxovirus <sup>13</sup>                       |
| HQ660136          | Bat Paramyxovirus <sup>13</sup>                       |
| FJ971935          | Bat Paramyxovirus <sup>13</sup>                       |
| FJ971939          | Bat Paramyxovirus <sup>13</sup>                       |
| JF828297          | Bat Paramyxovirus <sup>13</sup>                       |
| Z11575            | Human parainfluenza virus 3                           |
| NC_002161         | Bovine parainfluenzavirus 3                           |
| PAFZSTR           | Sendai virus                                          |
| NC_005084         | Fer de Lance virus                                    |
| NC_009640         | Porcine rubulavirus                                   |
| NC_009489         | Mapuera virus                                         |
| NC_002200         | Mumps virus                                           |
| HQ660095          | Bat Paramyxovirus 3                                   |

|           |                                   |
|-----------|-----------------------------------|
| X64275    | Simian parainfluenza virus 41     |
| NC_003443 | Human parainfluenza virus 2       |
| AF052755  | Simian virus 5                    |
| GU128082  | Tuhoko virus 3                    |
| GU128081  | Tuhoko virus 2                    |
| AF326114  | Menangle virus                    |
| AF298895  | Tioman virus                      |
| GU128080  | Tuhoko virus 1                    |
| EU627591  | Human parainfluenza virus 4       |
| AF077761  | Newcastle Disease virus           |
| NC_001781 | Human respiratory syncytial virus |
| M74568    | Human respiratory syncytial virus |
| AF092942  | Bovine resp syncytial virus       |
| AY743910  | Pneumonia virus of mice           |
| AY525843  | Human metapneumovirus             |
| DQ009484  | Avian metapneumovirus             |
| AB016162  | Measles virus                     |
| Z30697    | Rinderpest                        |
| NC_006383 | Peste des petits ruminants        |
| NC_005283 | Dolphin morbillivirus             |
| AF014953  | Canine distemper                  |
| Y09630    | Phocine distemper                 |
| AF079780  | Tupaia paramyxovirus              |
